# Supplementary material
Source: PubMed Central journal article supplement (PMC1472608)

Supplementary figure 1

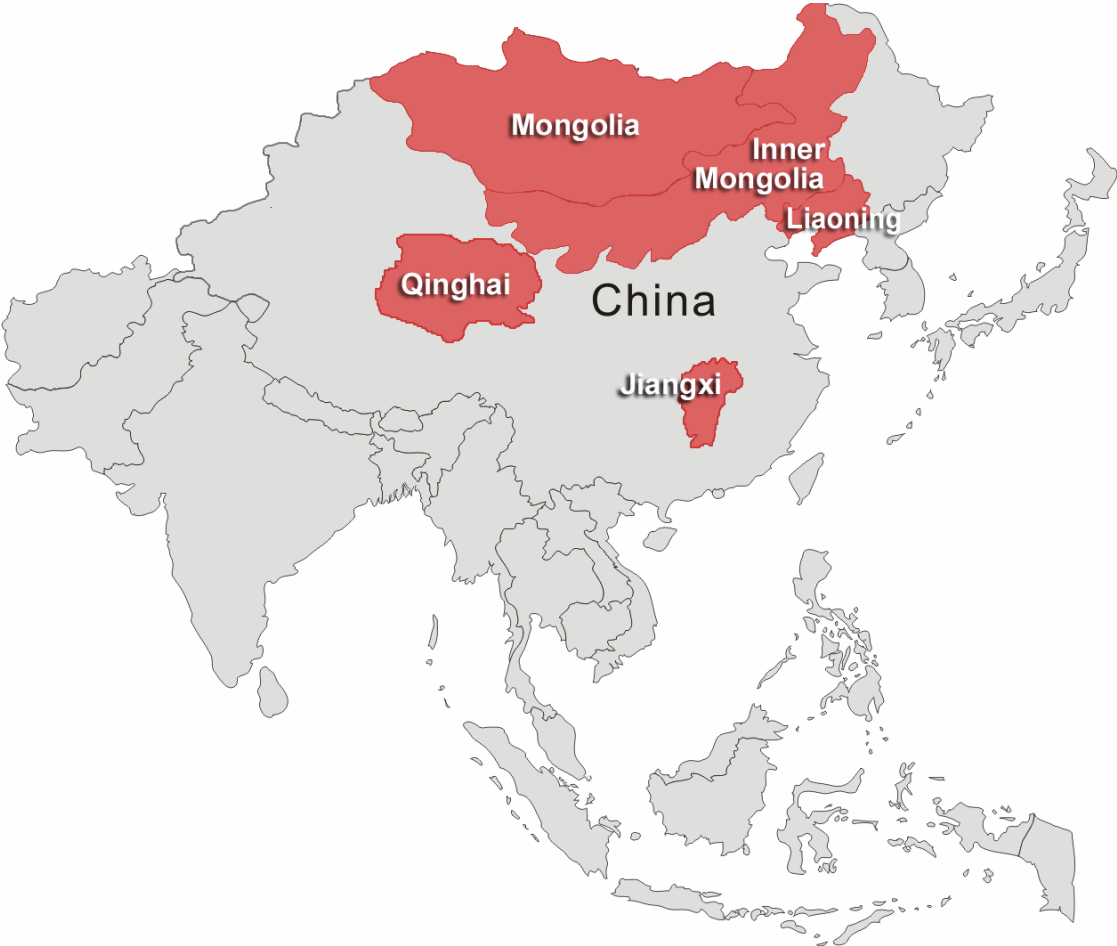

NP

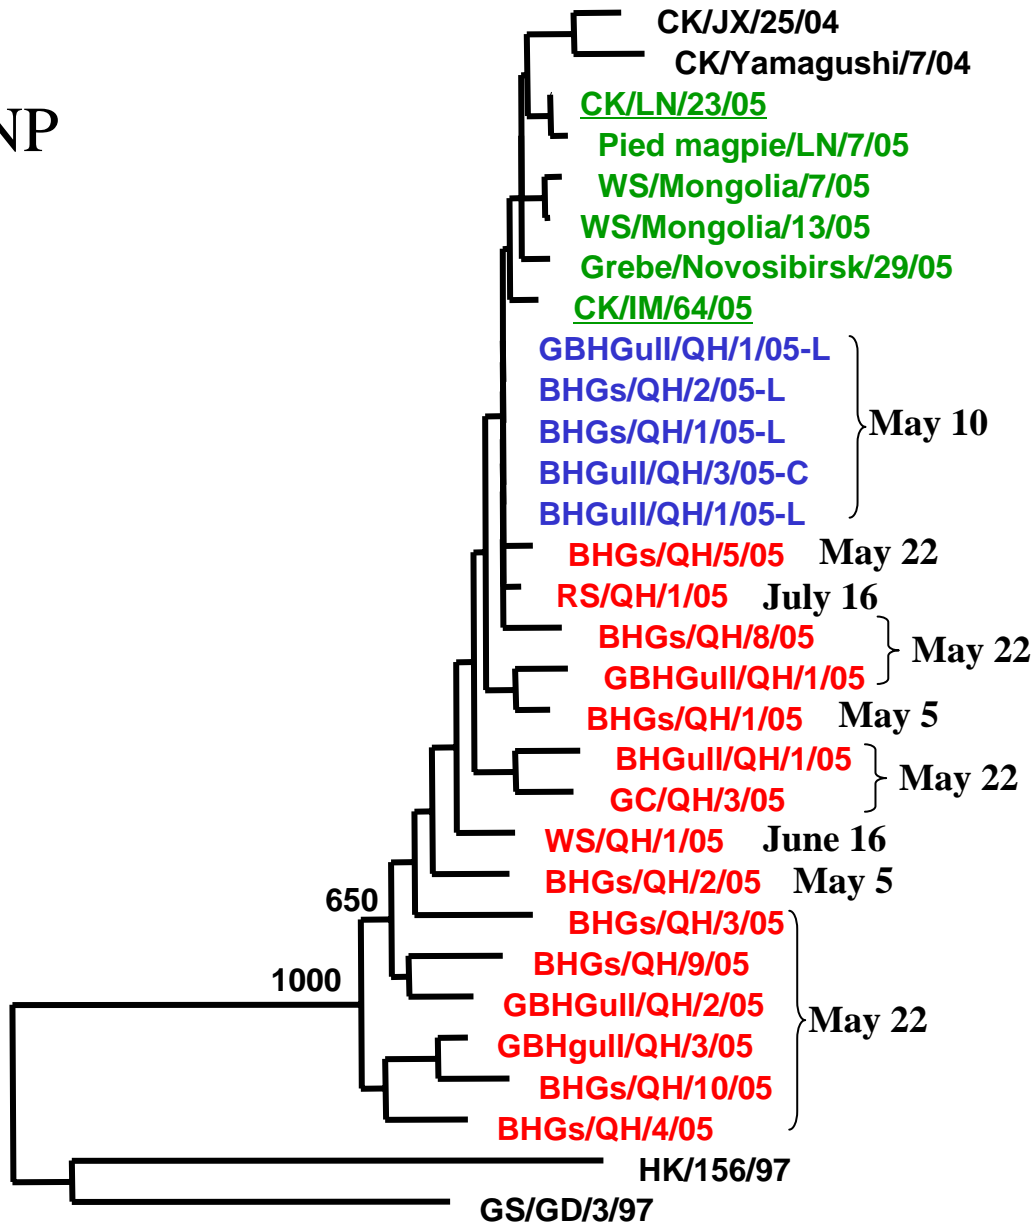

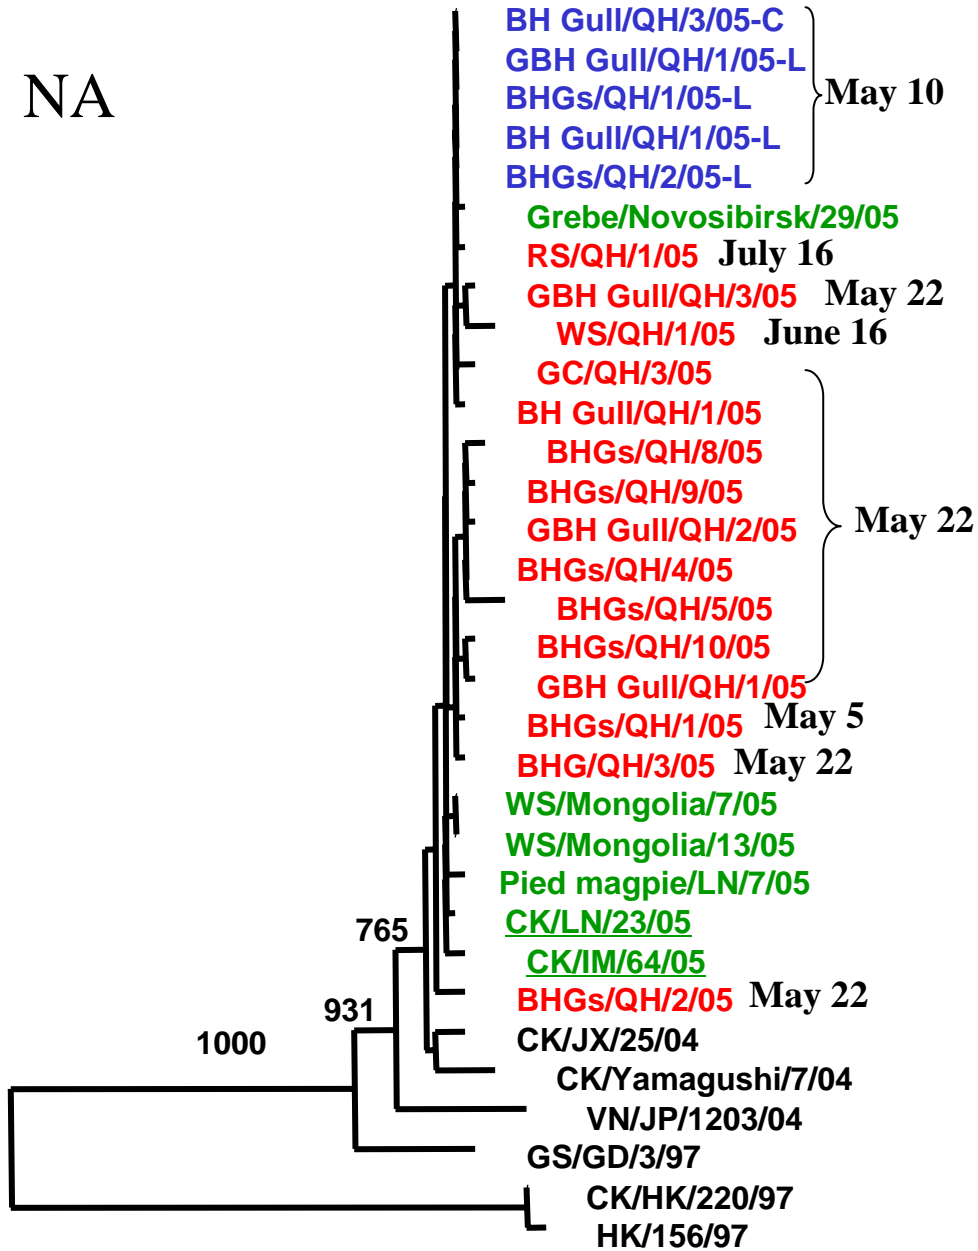

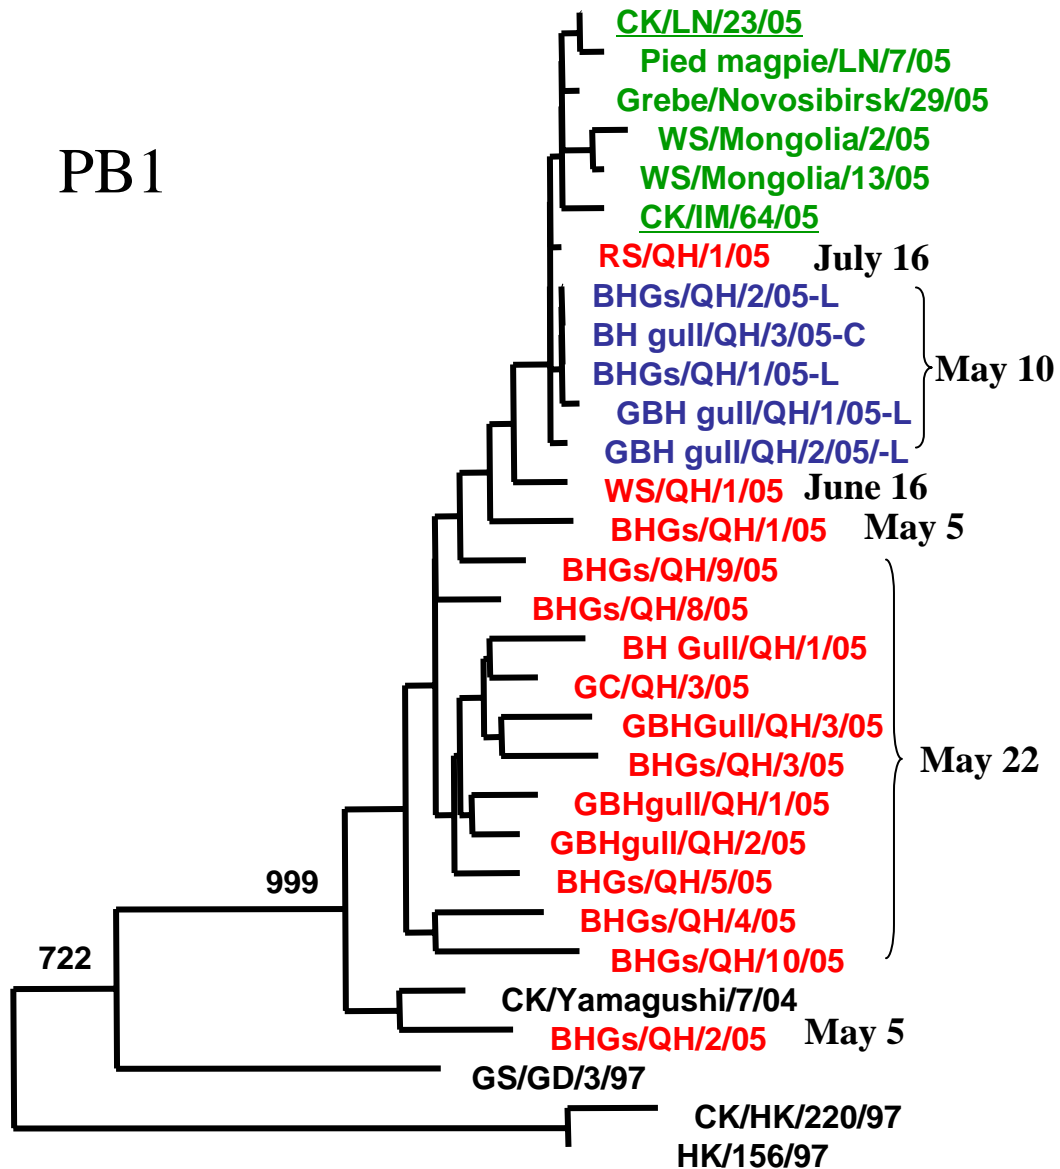

M

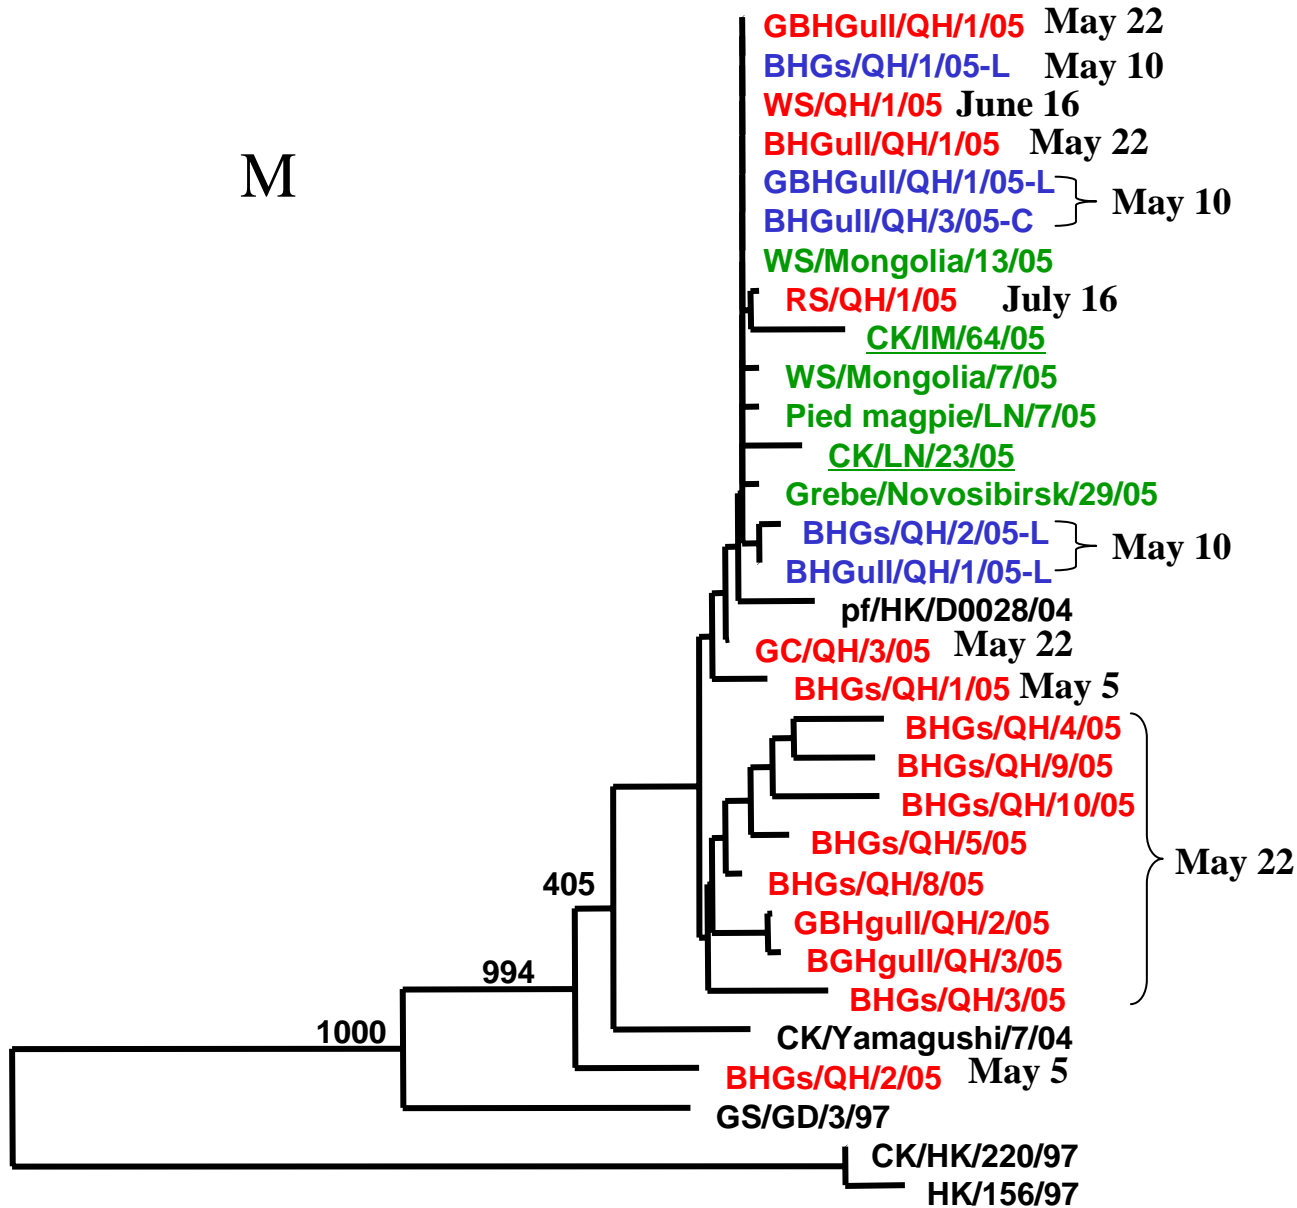

NS

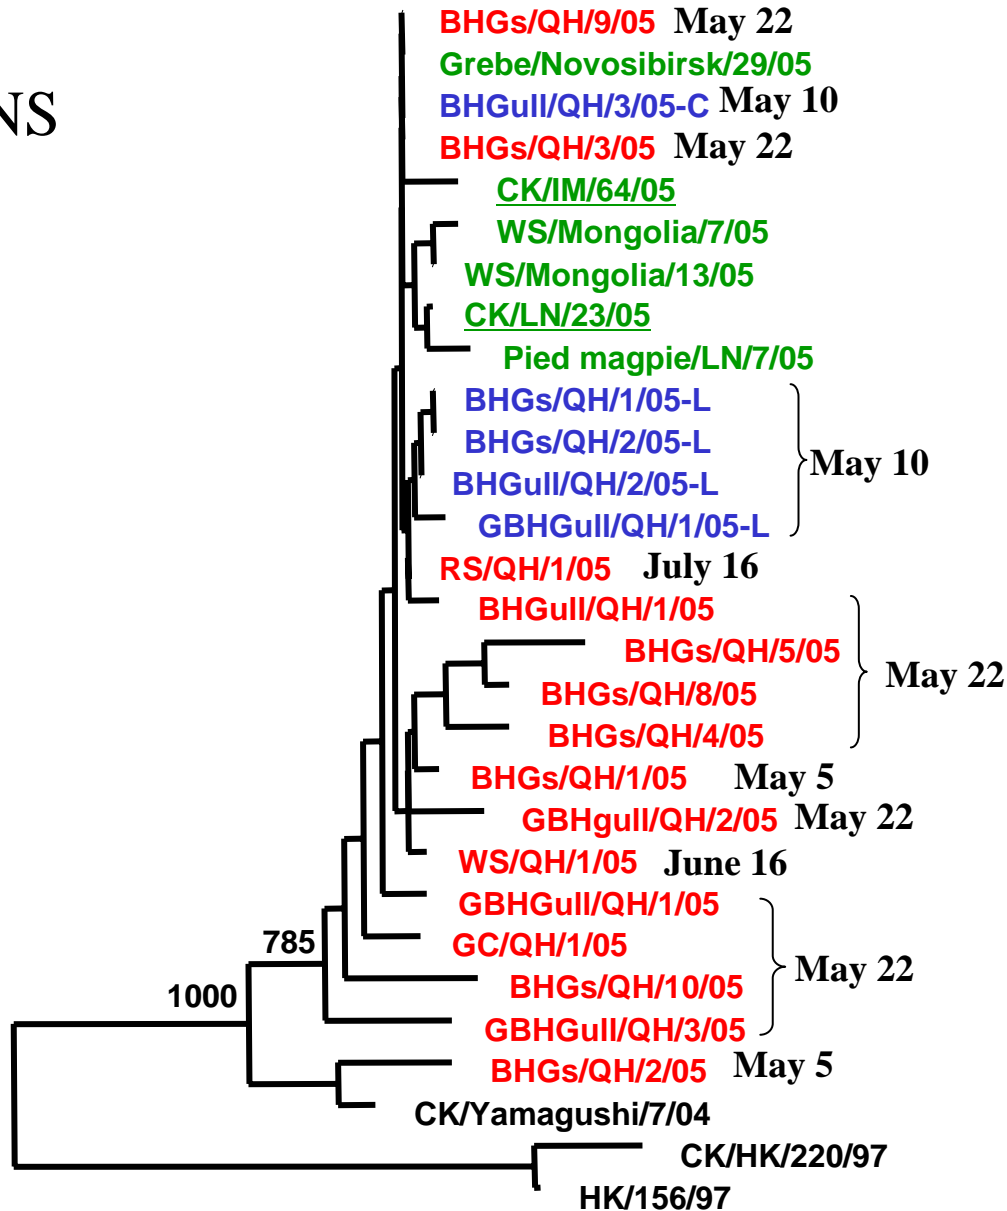

BHG<sub>s</sub>/QH/1/05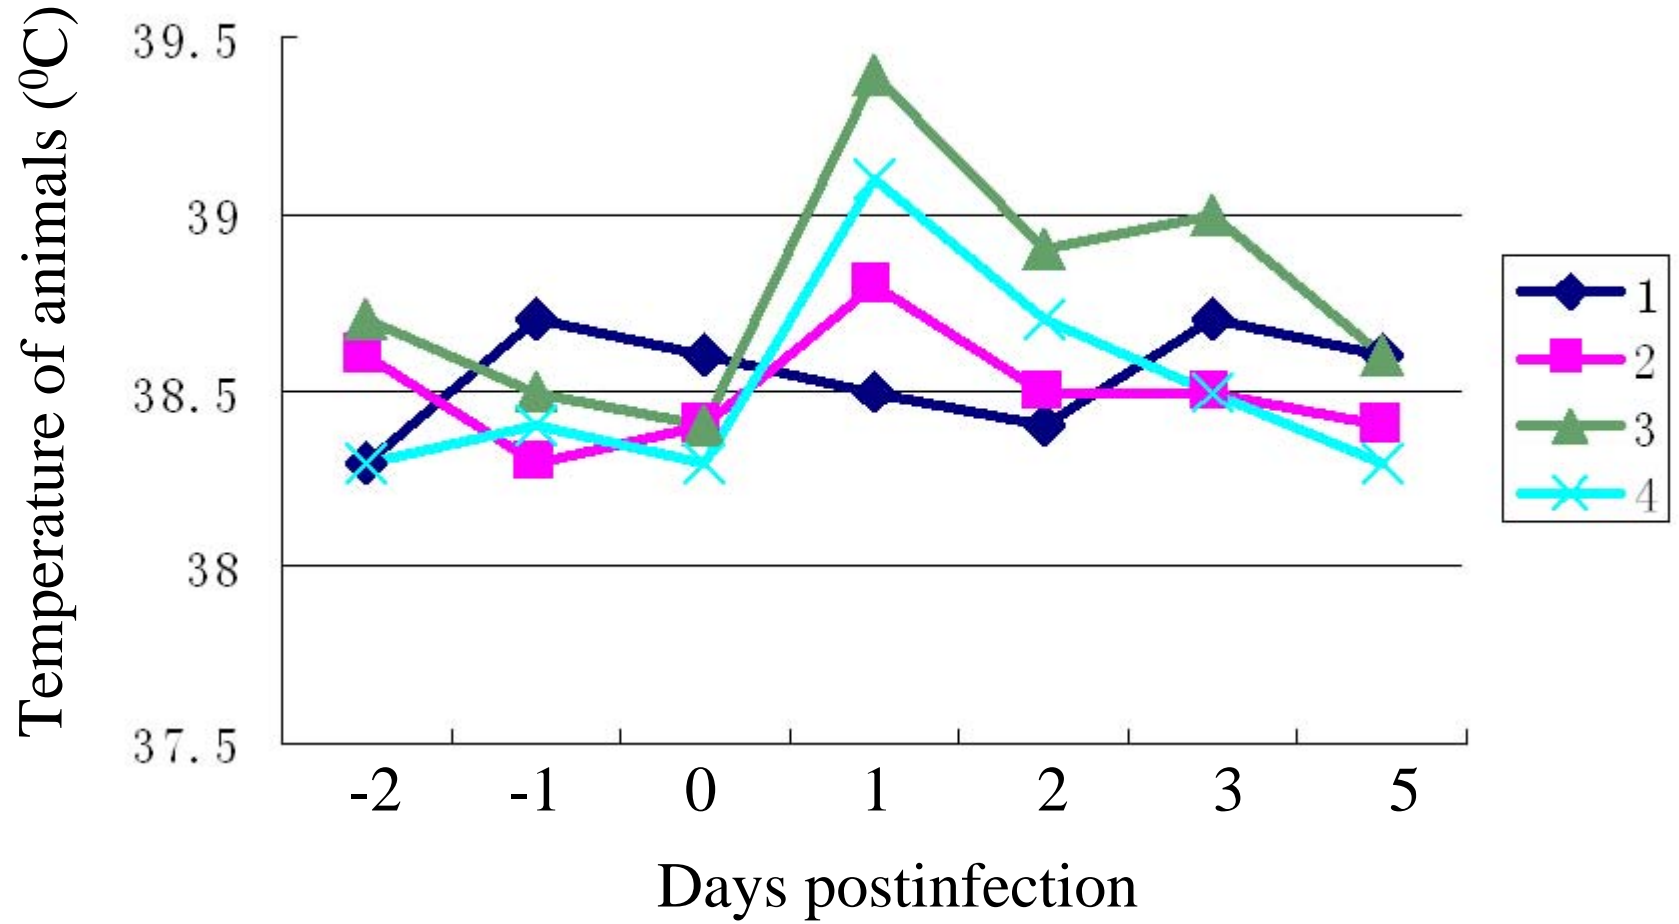

GC/QH/3/05

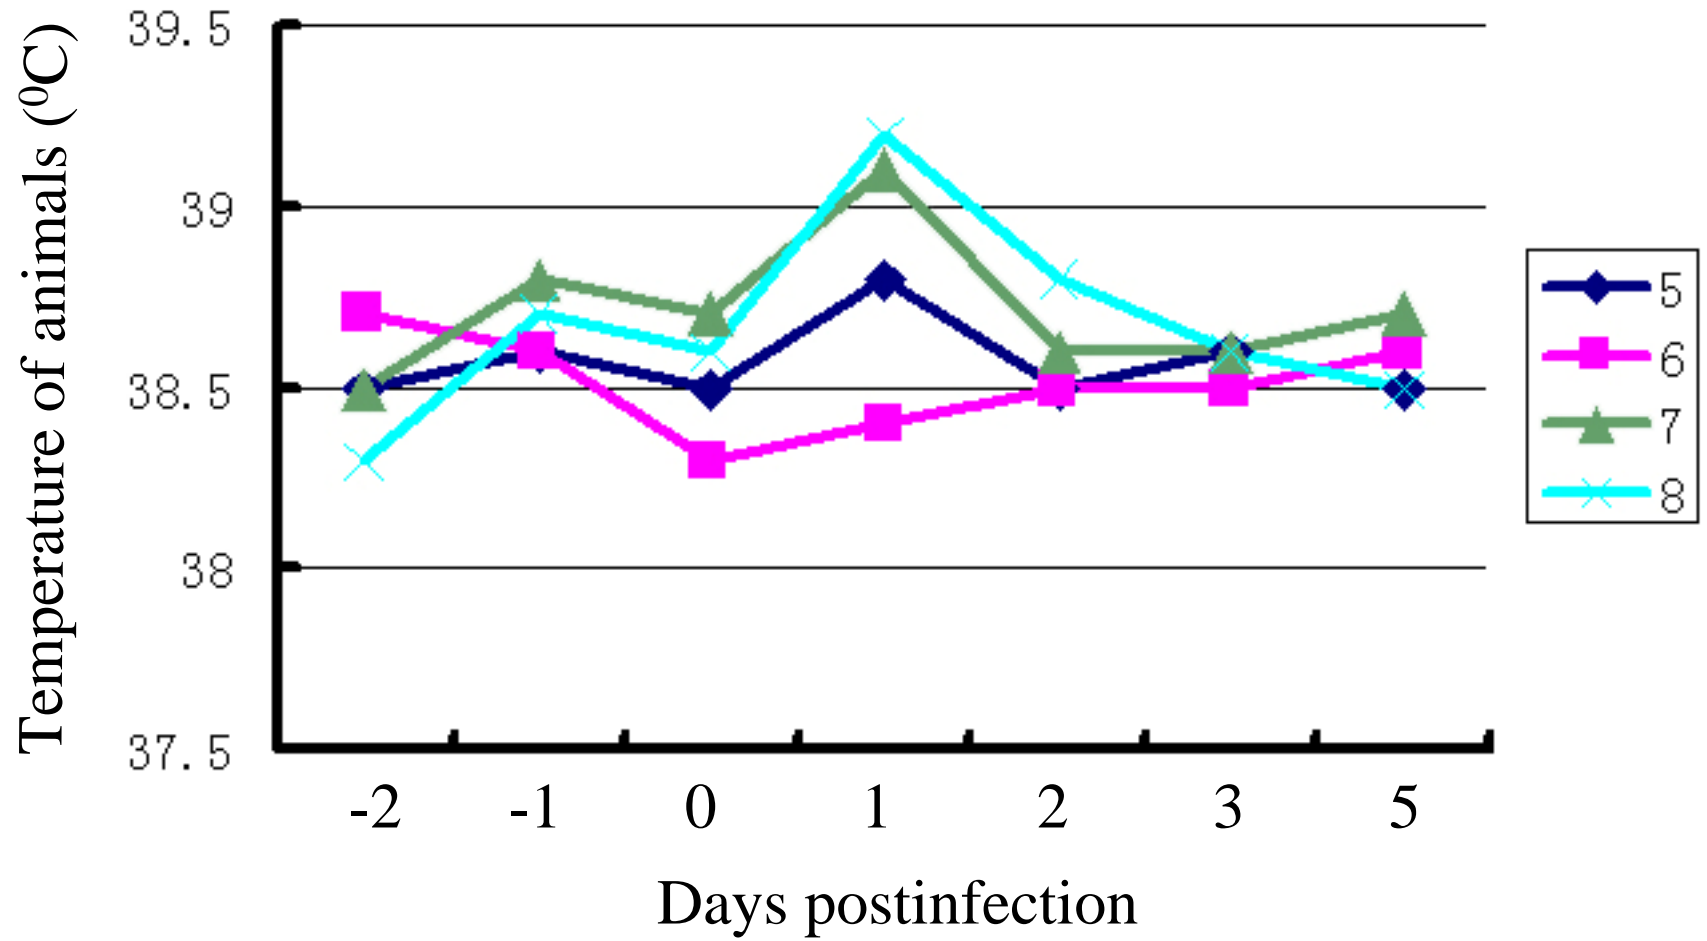



DK/GX/35/01

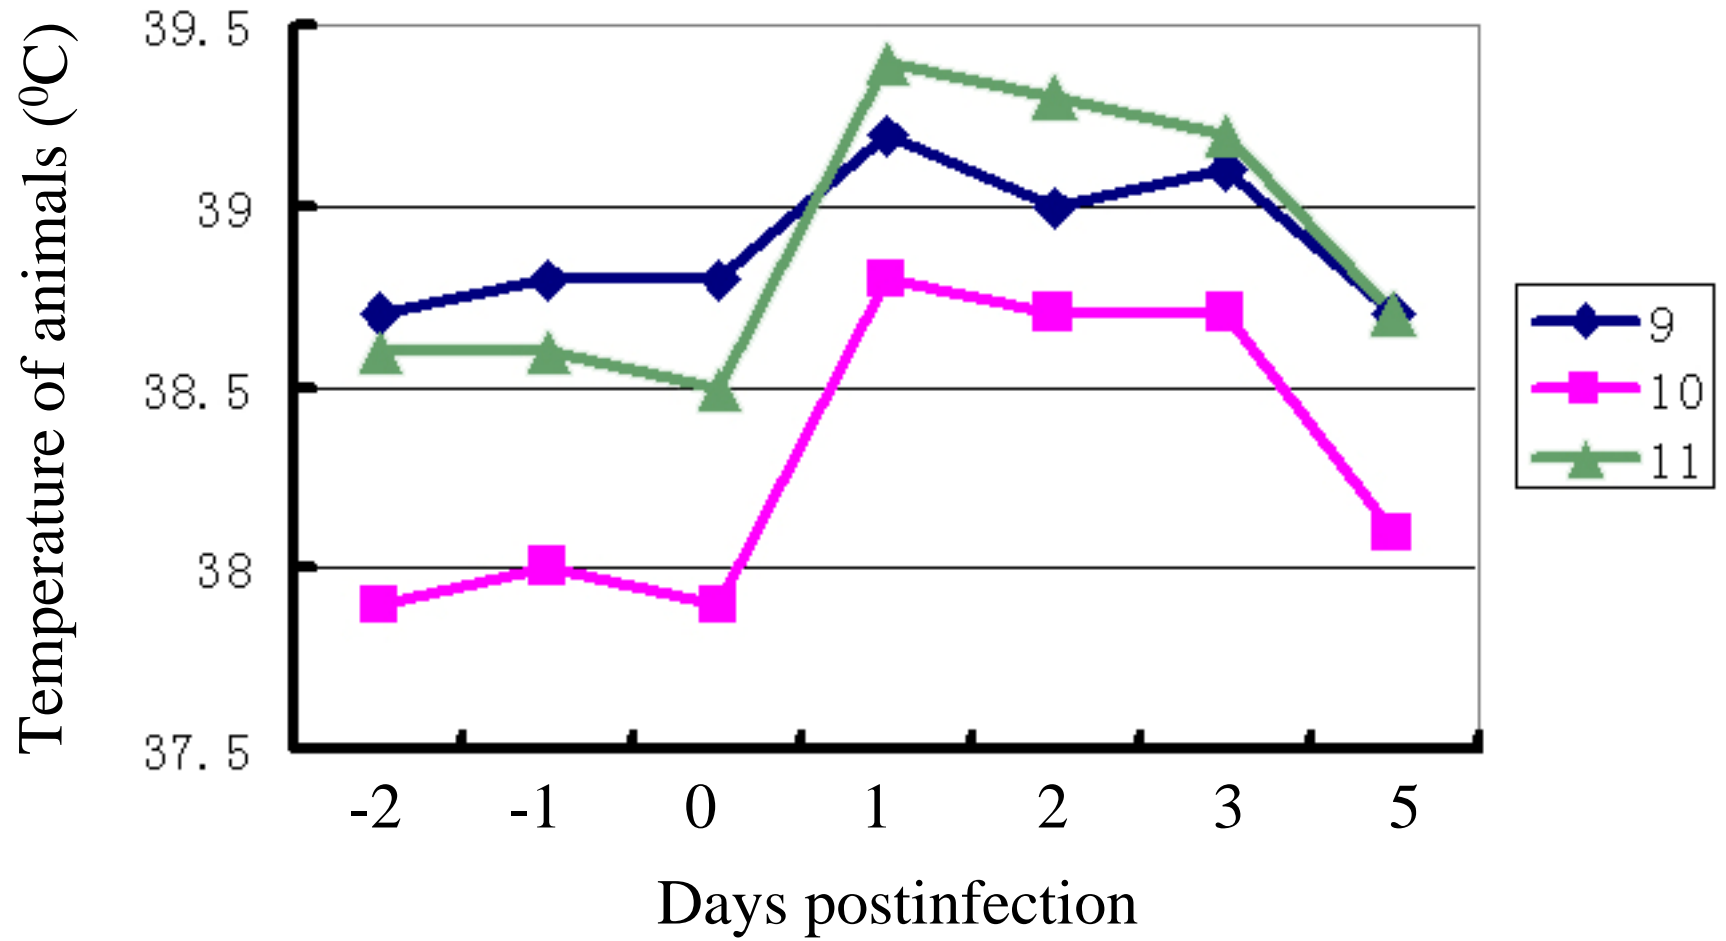

Supplement: jvirol_80_12_5976__1.pdf [file jvirol_80_12_5976__1.pdf]
